# Supplementary material for: A Synthetic Community Approach Reveals Plant Genotypes Affecting the Phyllosphere Microbiota
Source: PLOS journal article supplement (doi:10.1371/journal.pgen.1004283), 2014-04-17
Supplement: S11 (10.1371/journal.pgen.1004283.s011) [file journal.pgen.1004283.s011]

**Table S1. Gammaproteobacteria strains tested in this study.**

| Strain                              | Phylum              | Reference              | Reason for not including in the final community used for screening |
|-------------------------------------|---------------------|------------------------|--------------------------------------------------------------------|
| <i>Pseudomonas syringae</i> Psy642  | Gammaproteobacteria | [78]                   | Reduced plant growth                                               |
| <i>Pseudomonas viridiflava</i>      | Gammaproteobacteria | Laboratory collection* | Causes disease                                                     |
| <i>Pseudomonas fluorescens</i> pf-5 | Gammaproteobacteria | [79]                   | Reduced plant growth                                               |
| <i>Pseudomonas syringae</i> #13     | Gammaproteobacteria | Laboratory collection* | Reduced plant growth                                               |
| <i>Pantoea agglomerans</i> 299R     | Gammaproteobacteria | [80]                   | Causes disease                                                     |

\* isolated by C. Knief

## References

78. Clarke CR, Cai RM, Studholme DJ, Guttman DS, Vinatzer BA (2010) *Pseudomonas syringae* strains naturally lacking the classical *P. syringae* *hrp/hrc* locus are common leaf colonizers equipped with an typical type III secretion system. *Mol Plant Microbe Interact* 23: 198-210.
79. Howell CR, Stipanovic RD (1979) Control of *Rhizoctonia solani* on cotton seedlings with *Pseudomonas fluorescens* and with an antibiotic produced by the bacterium. *Phytopathology* 69: 480-482.
80. Brandl M, Clark EM, Lindow SE (1996) Characterization of the indole-3 acetic acid (IAA) biosynthetic pathway in an epiphytic strain of *Erwinia herbicola* and IAA production in vitro. *Can J Microb* 42: 586-592.
